# Supplementary material
Source: PubMed Central journal article supplement (PMC5122781)
Supplement: 10.1074_M116.762070_jbc.M116.762070-1.pdf [file 10.1074_M116.762070_jbc.M116.762070-1.pdf]

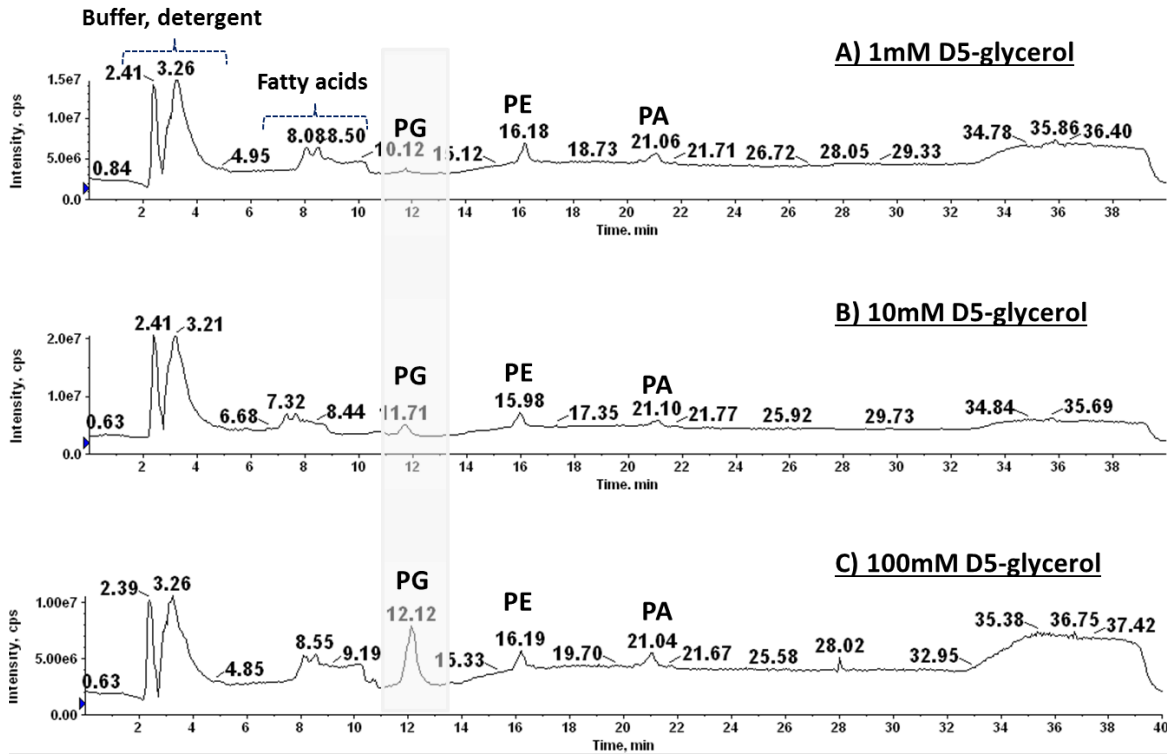

**FIGURE 1S. LC/MS analysis of *in vitro* synthesis of PG using glycerol as a substrate.** ClsB-expressing BKT29 membranes were incubated with *d*<sub>5</sub>-glycerol at various concentrations: A) 1 mM *d*<sub>5</sub>-glycerol; B) 10 mM *d*<sub>5</sub>-glycerol; C) 100 mM *d*<sub>5</sub>-glycerol. The level of PG increases (almost linearly) with the *d*<sub>5</sub>-glycerol concentration. In comparison, PA remains about the same while PE is slightly decreased. Note: due to the differences in ionization efficiency, the ion intensities of PG, PE and PA cannot be used to estimate their relative quantities.

### A) Yeast *Gep4-KO*

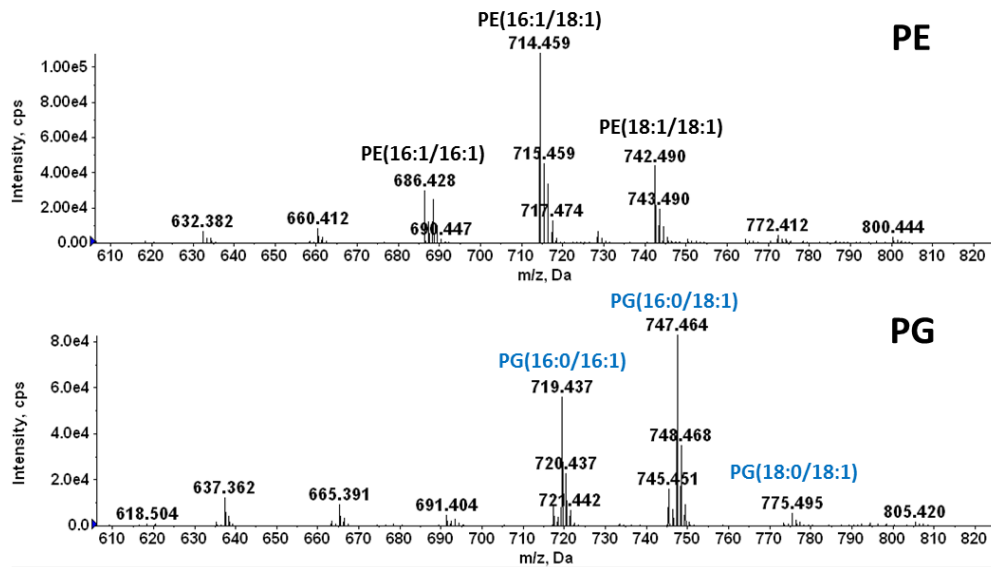

### B) Yeast *Gep4-KO + clsB*

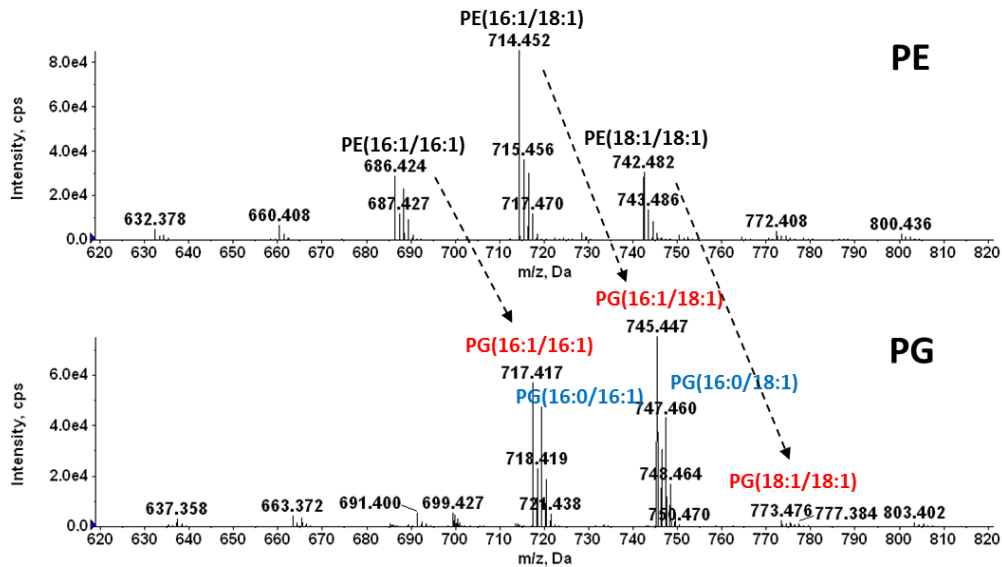

**FIGURE 2S. Expression of *ClsB* converts PE into PG in yeast cells.** A) The molecular species of PE and PG in the *Gep4* knockout mutant and wild-type (data not shown) yeast cells have different acyl chain compositions. For example, the most abundant PE species, PE (16:1/18:1) at  $m/z$  714.459, has two mono-unsaturated acyl chains, while the most abundant PG, PG (16:0/18:1) at  $m/z$  747.464, contains only one mono-unsaturated acyl chain. The acyl compositions of PE and PG in wild-type yeast cells are very similar to those in the *Gep4* knockout mutant. B) Expression of *ClsB* in the *Gep4* knockout mutant produces new PG molecular species (with red labels) with the same acyl compositions as the most abundant PE species, indicating the PE-to PG conversion by *clsB*. The CL level is significantly increased upon *clsB* expression (data not shown).
